# Supplementary material for: A Cd(II) Luminescent Coordination Grid as a Multiresponsive Fluorescence Sensor for Cr(VI) Oxyanions and Cr(III), Fe(III), and Al(III) in Aqueous Medium
Source: MDPI journal article supplement (doi:10.3390/molecules26237103), 2021-11-24
Supplement: s1 [file s1]

## Supporting Information

### **A Cd(II) luminescent coordination grid as a multiresponsive fluorescence sensor for Cr(VI) oxyanions and Cr(III), Fe(III), and Al(III) in aqueous medium**

**Kuo-Shun Liao,<sup>1</sup> Meng-Jung Tsai,<sup>1</sup> Li-Jen Hsu,<sup>1</sup> Chih-Min Wang<sup>2,3\*</sup> and Jing-Yun Wu<sup>1\*</sup>**

<sup>1</sup>Department of Applied Chemistry, National Chi Nan University, Nantou 545, Taiwan.

<sup>2</sup>Institute of Bioscience and Biotechnology National (Taiwan) Ocean University, Keelung 202, Taiwan.

<sup>3</sup>National (Taiwan) Ocean University Center of Excellence for the Oceans, Keelung 202, Taiwan.

E-mail: aasd6307@gmail.com (K.-S.L.); s97324905@mail1.ncnu.edu.tw (M.-J.T.);

Dodoadam1996@gmail.com (L.-J.H.)

\* Corresponding Author: cmwang@ntou.edu.tw (C.-M.W.), twcmwang@gmail.com (C.-M.W.), jyunwu@ncnu.edu.tw (J.-Y.W.)

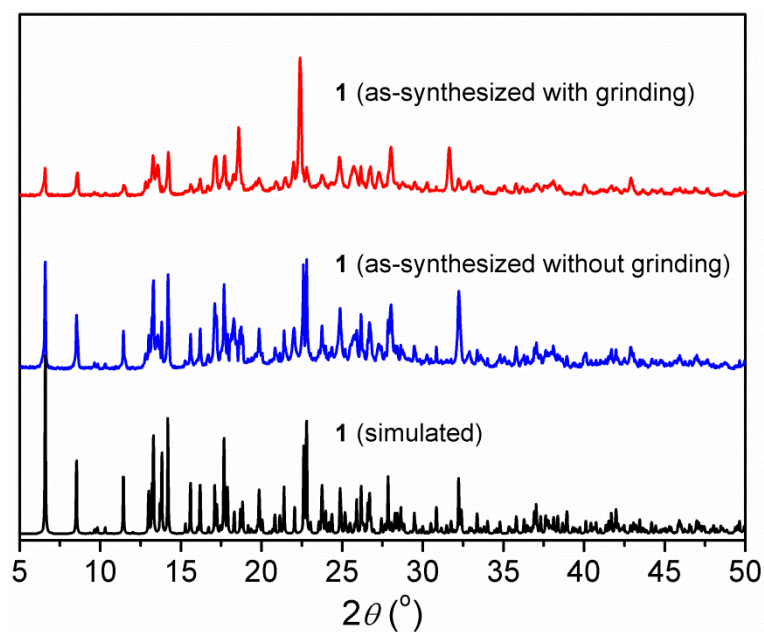

**Figure S1.** Simulated XRPD patterns of **1** and experimental XRPD patterns of as-synthesized **1** without and with grinding.

**Table S1.** Hydrogen-bonding parameters in **1**

| D–H...A      | <i>d</i> (D–H) | <i>d</i> (H...A) | <i>d</i> (D–A) | ∠(D–H...A) | Symmetry code                         |
|--------------|----------------|------------------|----------------|------------|---------------------------------------|
| O7–H101...O3 | 0.83           | 1.90             | 2.723(3)       | 171        | 1– <i>x</i> ,1– <i>y</i> ,1– <i>z</i> |
| O7–H102...O6 | 0.83           | 2.39             | 2.932(3)       | 124        | – <i>x</i> ,1– <i>y</i> ,1– <i>z</i>  |
| O8–H103...O9 | 0.86           | 2.24             | 3.035(5)       | 153        |                                       |
| O8–H104...O2 | 0.86           | 1.99             | 2.839(5)       | 167        | 1– <i>x</i> ,1– <i>y</i> , – <i>z</i> |
| O9–H105...O4 | 0.84           | 2.04             | 2.855(4)       | 162        | 1– <i>x</i> ,1– <i>y</i> ,1– <i>z</i> |

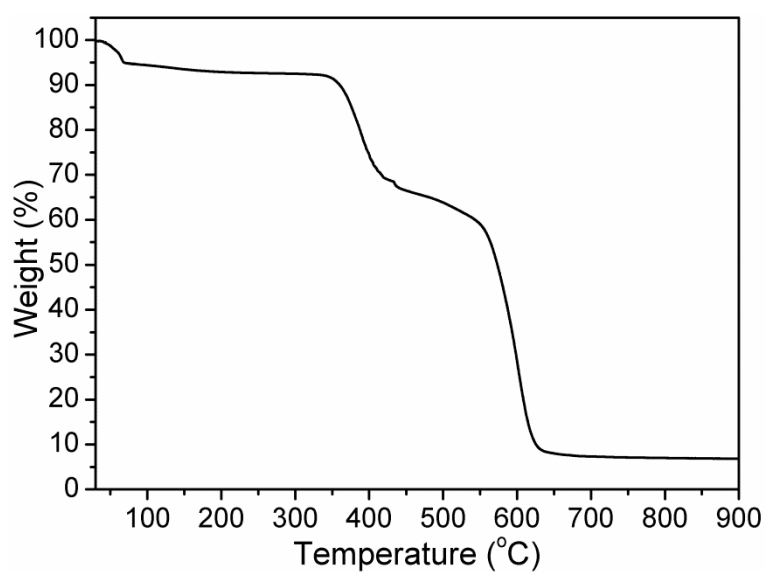

**Figure S2.** TG curve of **1**.

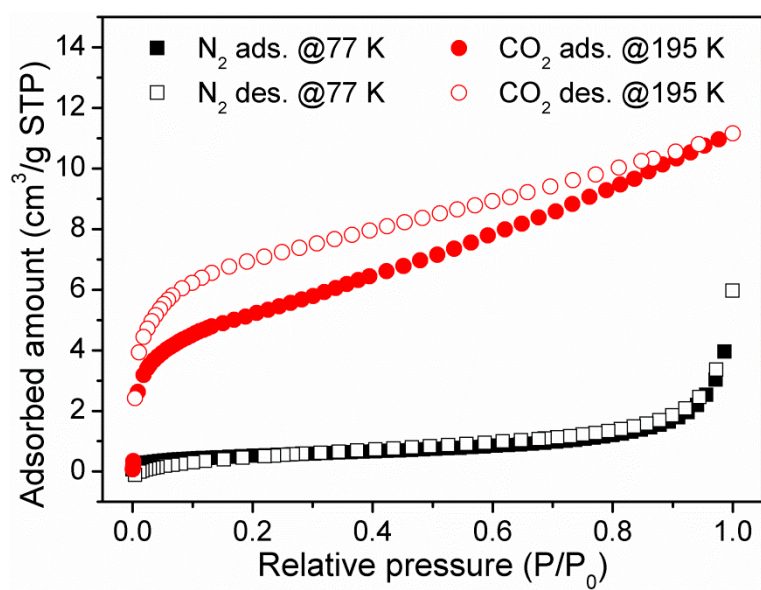

**Figure S3.** Gas adsorption isotherms for thermally activated **1** conducted at 77 K for N<sub>2</sub> and 195 K for CO<sub>2</sub>.

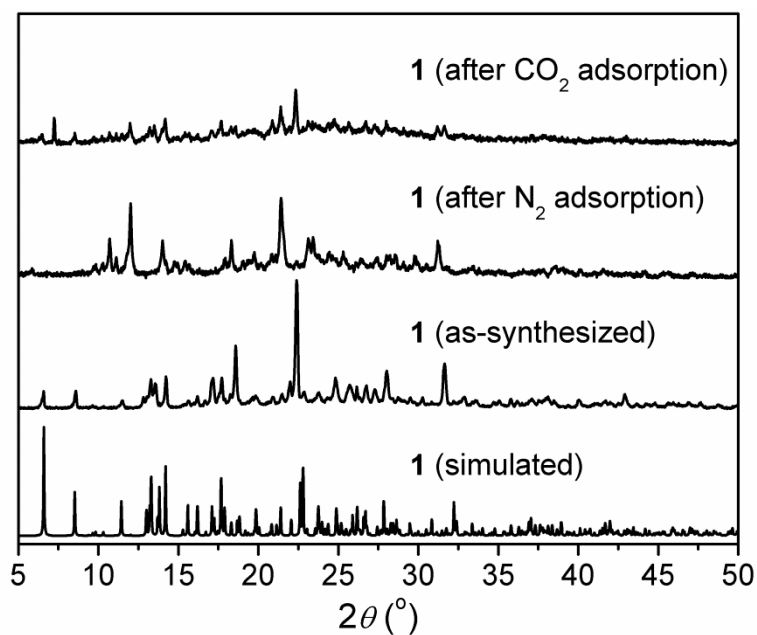

**Figure S4.** XRPD patterns of **1**: simulated, as-synthesized, and after  $\text{N}_2$  and  $\text{CO}_2$  adsorption.

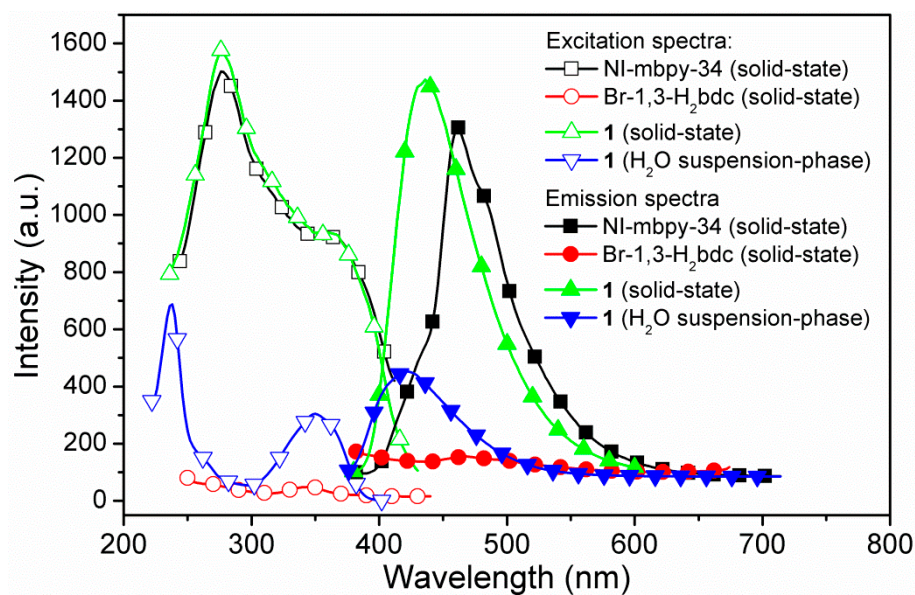

**Figure S5.** Fluorescence excitation and emission spectra of NI-mbpy-34, Br-1,3- $\text{H}_2$ bdc, and **1** in solid-state as well as **1** in  $\text{H}_2\text{O}$  suspension-phase at room temperature.

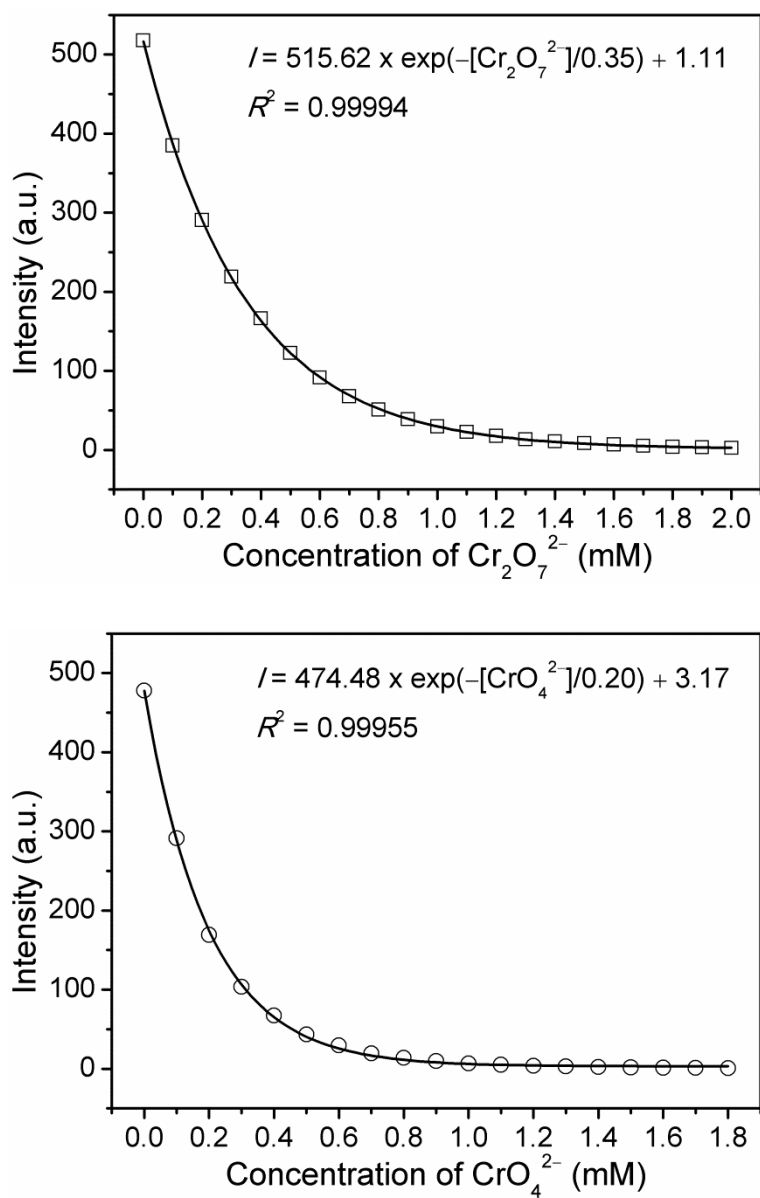

**Figure S6.** Fluorescence intensity traces for the  $\text{H}_2\text{O}$  suspensions of **1** upon incremental addition of  $\text{Cr}_2\text{O}_7^{2-}$  and  $\text{CrO}_4^{2-}$  ions, following the first-order exponential decay. Conditions:  $\lambda_{\text{em}} = 414 \text{ nm}$  ( $\lambda_{\text{ex}} = 365 \text{ nm}$ ).

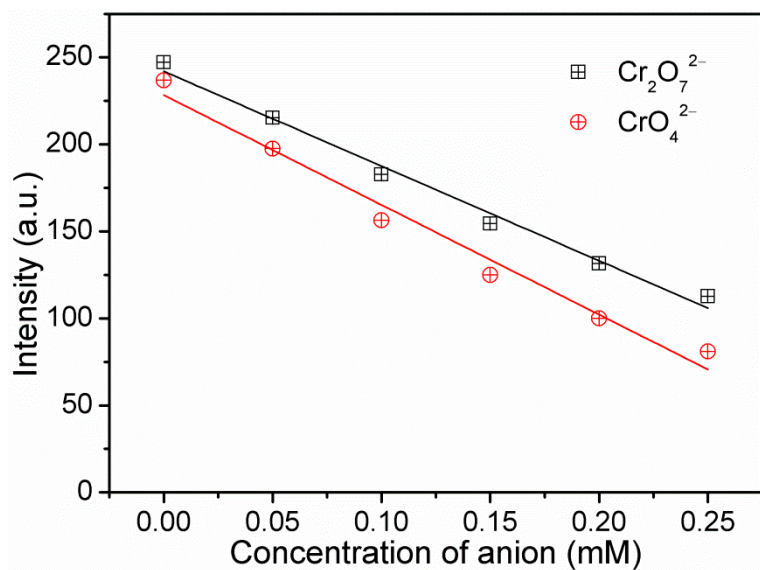

| Blank readings                           | Cr <sub>2</sub> O <sub>7</sub> <sup>2-</sup> | CrO <sub>4</sub> <sup>2-</sup> |
|------------------------------------------|----------------------------------------------|--------------------------------|
| #1                                       | 243.5                                        | 233.1                          |
| #2                                       | 245.8                                        | 233.6                          |
| #3                                       | 246.2                                        | 235.6                          |
| #4                                       | 247.8                                        | 238.7                          |
| #5                                       | 250.8                                        | 240.4                          |
| Standard deviation ( $\sigma$ )          | 2.70                                         | 3.19                           |
| Slope (m)                                | 544.1                                        | 630.7                          |
| $R^2$                                    | 0.9871                                       | 0.97603                        |
| LOD ( $3\sigma/m$ ), $\mu\text{M}$ (ppm) | 14.91 (3.22)                                 | 15.15 (1.76)                   |

**Figure S7.** Linear region of fluorescence intensity for the H<sub>2</sub>O suspensions of **1** upon incremental addition of Cr<sub>2</sub>O<sub>7</sub><sup>2-</sup> and CrO<sub>4</sub><sup>2-</sup> ions. The following table lists the relevant parameters of LOD for the H<sub>2</sub>O suspensions of **1** toward Cr<sub>2</sub>O<sub>7</sub><sup>2-</sup> and CrO<sub>4</sub><sup>2-</sup> ions. Conditions:  $\lambda_{\text{em}} = 420 \text{ nm}$  ( $\lambda_{\text{ex}} = 365 \text{ nm}$ ).

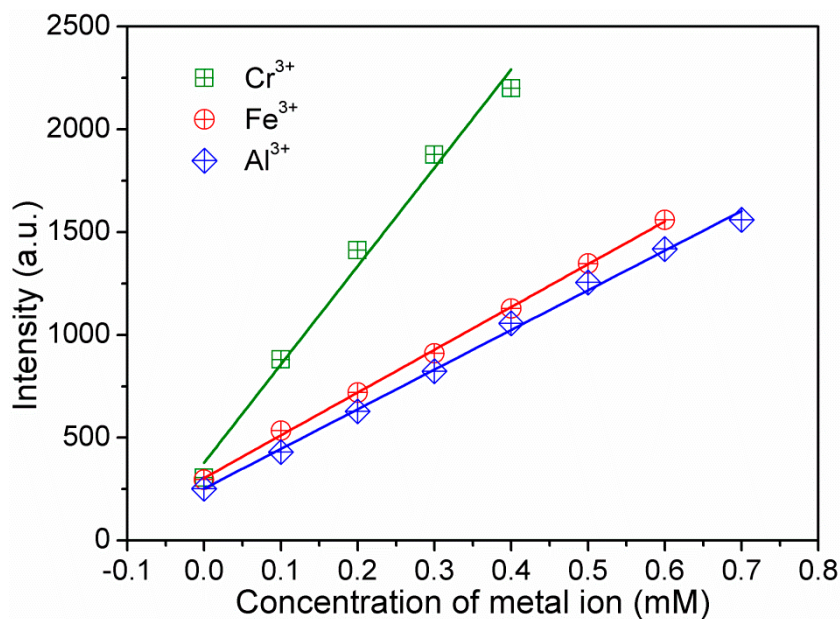

| Blank readings                                                      | Cr <sup>3+</sup>    | Fe <sup>3+</sup>    | Al <sup>3+</sup>   |
|---------------------------------------------------------------------|---------------------|---------------------|--------------------|
| #1                                                                  | 293.3               | 290.4               | 251.6              |
| #2                                                                  | 297.3               | 296.6               | 253.0              |
| #3                                                                  | 298.5               | 290.6               | 256.2              |
| #4                                                                  | 300.6               | 294.5               | 255.8              |
| #5                                                                  | 305.5               | 293.7               | 256.4              |
| <b>Standard deviation (<math>\sigma</math>)</b>                     | <b>4.48</b>         | <b>2.65</b>         | <b>2.17</b>        |
| <b>  Slope (<math>k</math>)  </b>                                   | <b>4785.8</b>       | <b>2080.9</b>       | <b>1930.0</b>      |
| $R^2$                                                               | 0.98603             | 0.99898             | 0.99646            |
| <b>LOD (<math>3\sigma/k</math>), <math>\mu\text{M}</math> (ppb)</b> | <b>2.81 (146.2)</b> | <b>3.82 (198.7)</b> | <b>3.37 (90.9)</b> |

**Figure S8.** Linear region of fluorescence intensity for the H<sub>2</sub>O suspensions of **1** upon incremental addition of Cr<sup>3+</sup>, Fe<sup>3+</sup>, and Al<sup>3+</sup> ions. The following table lists the relevant parameters of LOD for the H<sub>2</sub>O suspensions of **1** toward Cr<sup>3+</sup>, Fe<sup>3+</sup>, and Al<sup>3+</sup> ions. Conditions:  $\lambda_{\text{em}} = 414 \text{ nm}$  ( $\lambda_{\text{ex}} = 365 \text{ nm}$ ).



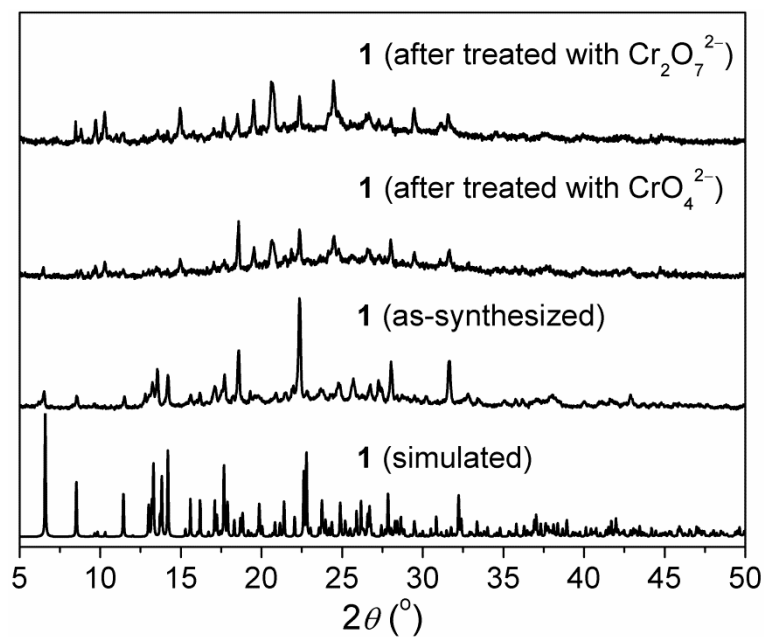

**Figure S9.** XRPD patterns of **1** before and after immersing in  $\text{Cr}_2\text{O}_7^{2-}$  and  $\text{CrO}_4^{2-}$  aqueous solutions for 24 h.

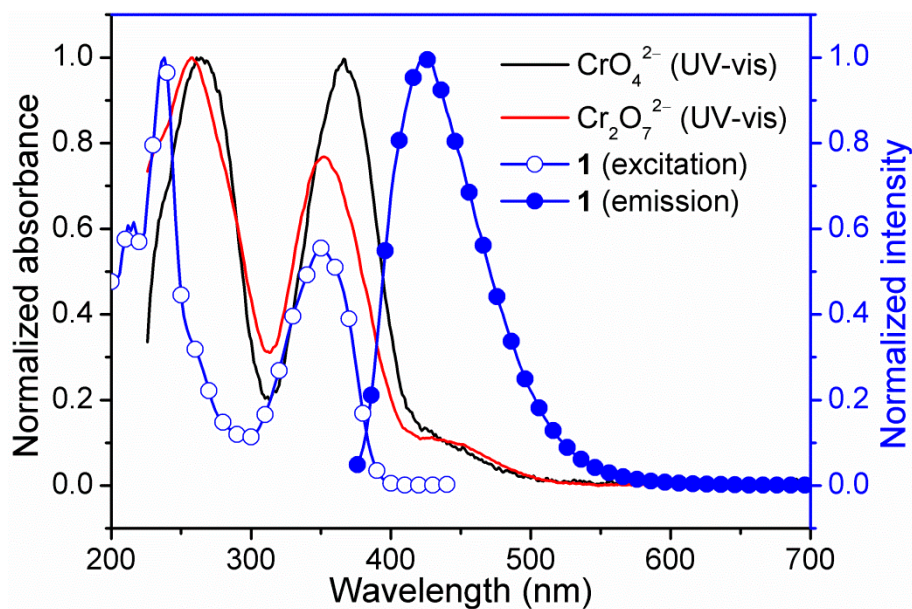

**Figure S10.** Spectral overlap between the normalized absorption spectra of  $\text{Cr}_2\text{O}_7^{2-}$  and  $\text{CrO}_4^{2-}$  in aqueous solutions and the normalized excitation and emission spectra of **1** in  $\text{H}_2\text{O}$  suspensions.



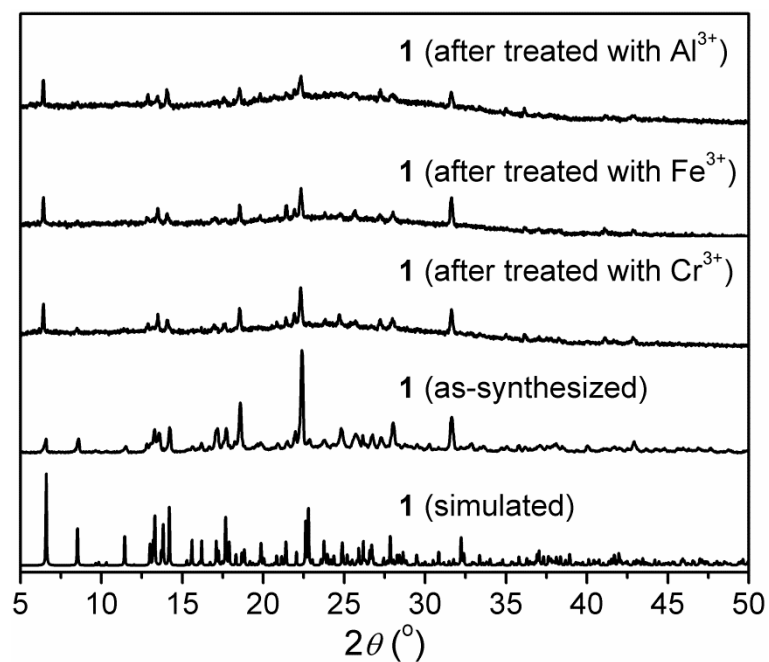

**Figure S11.** XRPD patterns of **1** before and after treated with  $\text{Cr}^{3+}$ ,  $\text{Fe}^{3+}$ , and  $\text{Al}^{3+}$  in water for 24 h.

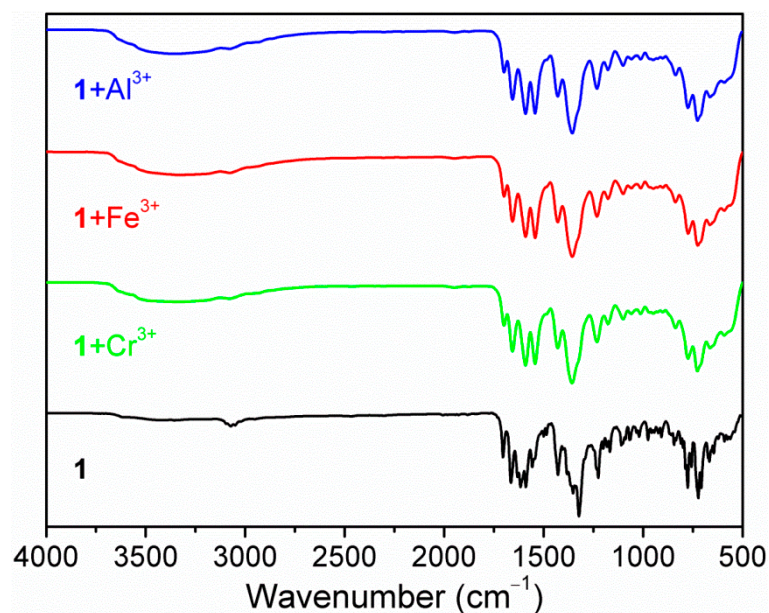

**Figure S12.** IR spectra of **1** before and after treated with  $\text{Cr}^{3+}$ ,  $\text{Fe}^{3+}$ , and  $\text{Al}^{3+}$  in water for 24 h.

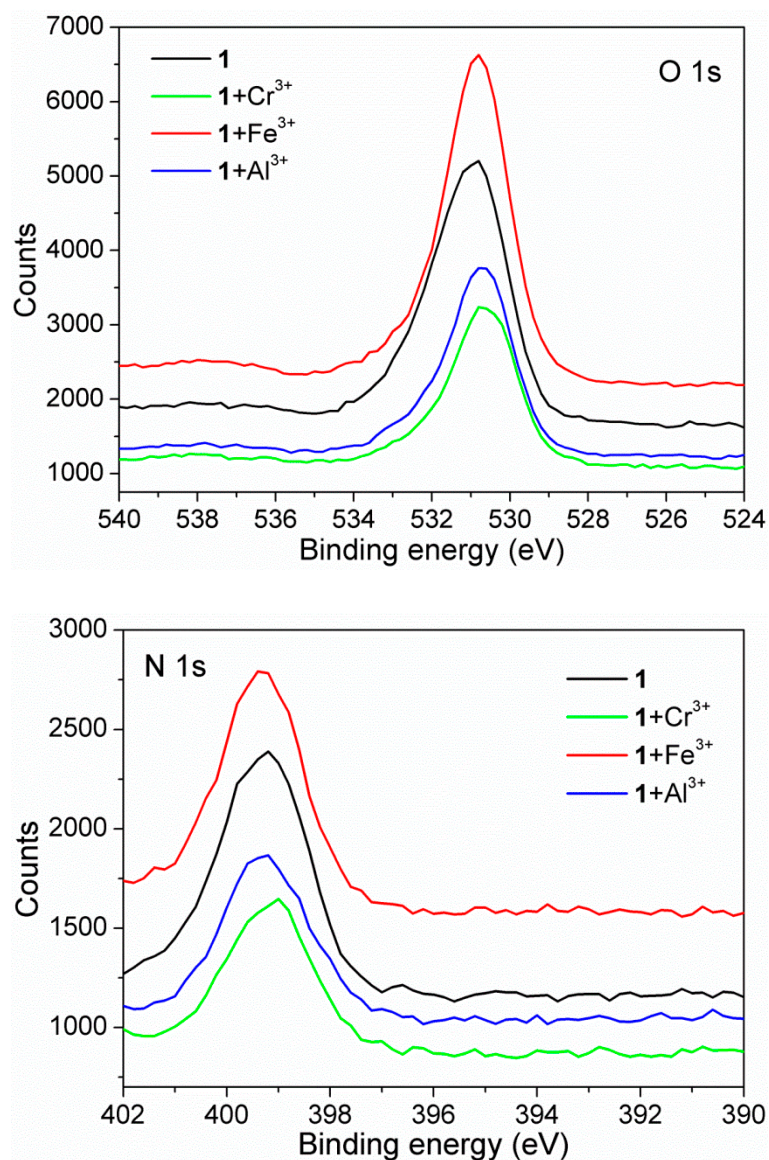

**Figure S13.** XPS high resolution spectra of O 1s and N 1s of **1** before and after treated with Cr<sup>3+</sup>, Fe<sup>3+</sup>, and Al<sup>3+</sup> in water for 24 h.

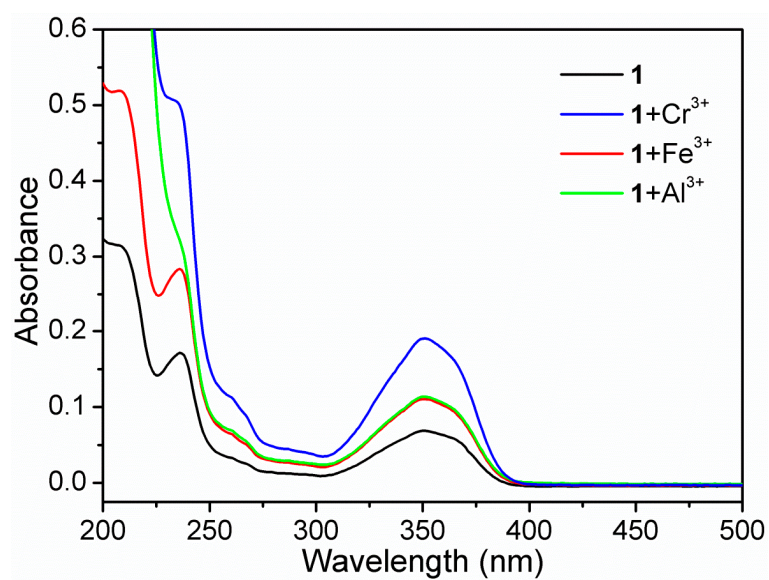

**Figure S14.** UV-vis spectra of **1** before and after addition of Cr<sup>3+</sup>, Fe<sup>3+</sup>, and Al<sup>3+</sup>.
